# Supplementary material
Source: MDPI journal article supplement (https://www.mdpi.com/2079-6412/10/7/693)
Supplement: s1 [file s1]

# Supplementary Materials: Green Solid-State Chemical Reduction of Graphene Oxide Supported on a Paper Substrate

Angela Longo, Mariano Palomba \* and Gianfranco Carotenuto

Institute for Polymers, Composites, and Biomaterials, National Research Council, UOS Napoli/Portici, Piazzale Enrico Fermi 1, Portici, 80055 Naples, Italy; angela.longo@cnr.it (A.L.); giancaro@unina.it (G.C.)

\* Correspondence: mariano.palomba@cnr.it

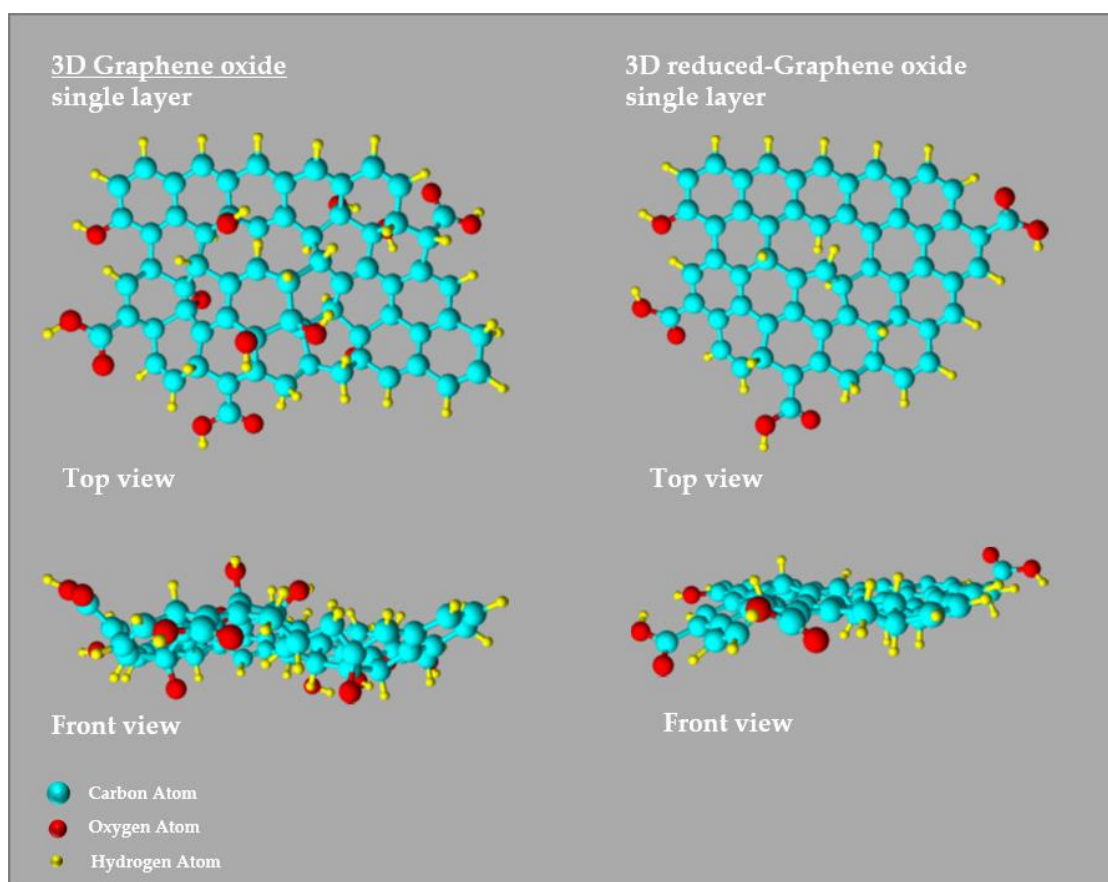

**Figure S1:** Optimized 3-D images of GO and r-GO.

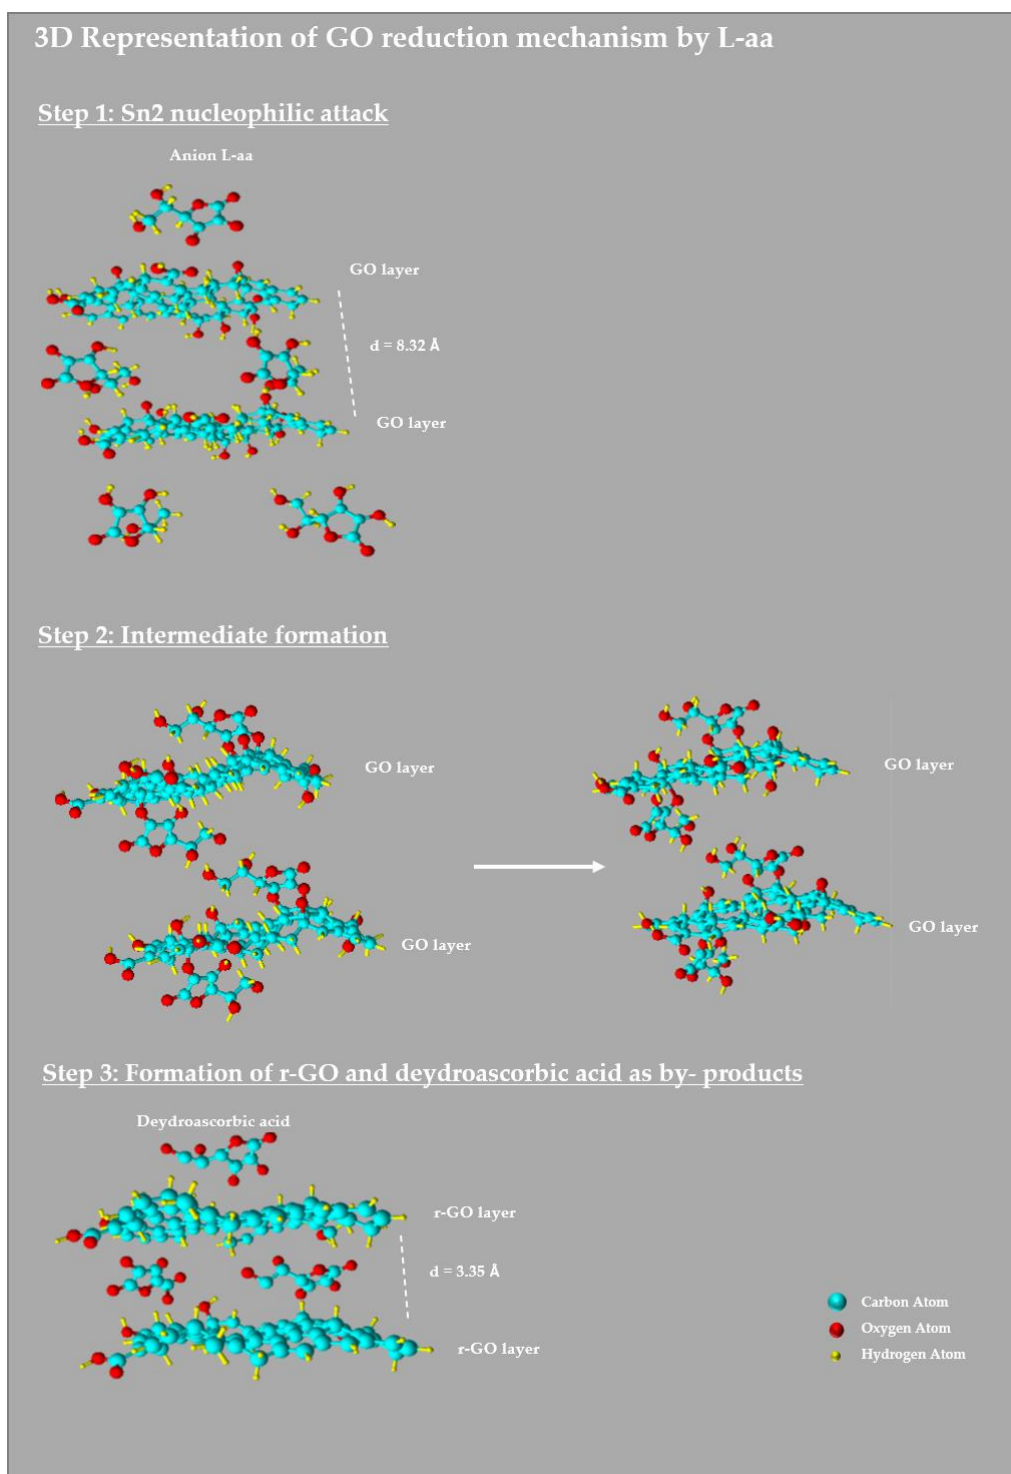

**Figure S2:** Optimized 3-D images of different reaction intermediate and some more structural information about the kinetic mechanism.

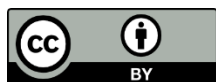

© 2020 by the authors. Submitted for possible open access publication under the terms and conditions of the Creative Commons Attribution (CC BY) license (<http://creativecommons.org/licenses/by/4.0/>).
